# Supplementary material
Source: PubMed Central journal article supplement (PMC4198482)
Supplement: NIHMS622407-supplement-251_2014_794_MOESM1_ESM.pdf [file NIHMS622407-supplement-251_2014_794_MOESM1_ESM.pdf]

a.

| HLA-C<br>allotype | KIR<br>Ligand | Cognate KIR |      |      |       | Ligand frequency |            |
|-------------------|---------------|-------------|------|------|-------|------------------|------------|
|                   |               |             |      |      |       | Māori            | Polynesian |
| C*01:02           | C1            | 2DL2        | 2DL3 | 2DS4 | 0.448 | 0.250            |            |
| C*03:03           | C1            | 2DL2        | 2DL3 |      | 0.010 | 0.016            |            |
| C*03:04           | C1            | 2DL2        | 2DL3 |      | 0.010 | 0.094            |            |
| C*07:01           | C1            | 2DL2        | 2DL3 |      | 0.021 | 0.031            |            |
| C*07:02           | C1            | 2DL2        | 2DL3 |      | 0.104 | 0.094            |            |
| C*07:04           | C1            | 2DL2        | 2DL3 |      | 0.010 |                  |            |
| C*08:01           | C1            | 2DL2        | 2DL3 |      | 0.104 | 0.078            |            |
| C*01:01           | C1            | 2DL2        | 2DL3 | 2DS4 |       | 0.047            |            |
| C*07:139          | C1            | 2DL2        | 2DL3 |      | 0.010 | 0.016            |            |
| C*04:01           | C2            | 2DL1/S1     | 2DL2 | 2DL3 | 2DS4  | 0.094            | 0.063      |
| C*04:03           | C2            | 2DL1/S1     | 2DL2 | 2DL3 | 2DS4  | 0.083            | 0.109      |
| C*05:01           | C2            | 2DL1/S1     | 2DL2 | 2DL3 | 2DS4  | 0.010            | 0.016      |
| C*06:02           | C2            | 2DL1/S1     | 2DL2 |      |       |                  | 0.016      |
| C*12:03           | C2            | 2DL1/S1     | 2DL2 |      |       | 0.031            | 0.047      |
| C*15:02           | C2            | 2DL1/S1     | 2DL2 |      |       | 0.031            | 0.078      |
| C*15:05           | C2            | 2DL1/S1     | 2DL2 |      |       | 0.010            |            |
| C*04:16           | C2            | 2DL1/S1     | 2DL2 | 2DL3 | 2DS4  |                  | 0.016      |
| C*04:71           | C2            | 2DL1/S1     | 2DL2 | 2DL3 | 2DS4  |                  | 0.016      |
| C*06:01           | C2            | 2DL1/S1     | 2DL2 |      |       | 0.010            | 0.016      |
| C*12:02           | C2            | 2DL1/S1     | 2DL2 |      |       | 0.010            |            |

b.

| HLA-A<br>allotype | Cognate<br>KIR | Ligand frequency |            |
|-------------------|----------------|------------------|------------|
|                   |                | Māori            | Polynesian |
| A*01:01           |                | 0.061            | 0.015      |
| A*02:01           |                | 0.041            | 0.121      |
| A*02:05           |                | 0.010            |            |
| A*02:06           |                | 0.286            | 0.136      |
| A*02:12           |                | 0.010            |            |
| A*11:01           | 3DL2 2DS4      | 0.173            | 0.152      |
| A*24:02           | 3DL1           | 0.367            | 0.394      |
| A*26:01           |                |                  | 0.030      |
| A*34:01           |                | 0.051            | 0.152      |

c.

| HLA-B<br>allotype | Cognate<br>KIR | Ligand frequency |            |
|-------------------|----------------|------------------|------------|
|                   |                | Māori            | Polynesian |
| B*07:02           |                | 0.010            |            |
| B*07:05           |                | 0.010            |            |
| B*08:01           |                | 0.031            | 0.015      |
| B*13:01           |                | 0.041            | 0.045      |
| B*15:01           |                | 0.020            |            |
| B*15:06           |                |                  | 0.015      |
| B*15:21           |                |                  | 0.030      |
| B*27:04           |                | 0.010            |            |
| B*27:05           |                |                  | 0.015      |
| B*39:01           |                | 0.082            | 0.076      |
| B*39:04           |                |                  | 0.015      |
| B*40:01           |                | 0.112            | 0.258      |
| B*40:02           |                | 0.031            | 0.061      |
| B*40:04           |                |                  | 0.015      |
| B*40:10           |                | 0.082            | 0.061      |
| B*44:02           | 3DL1           | 0.020            | 0.015      |
| B*48:01           |                | 0.112            | 0.091      |
| B*55:02           |                | 0.357            | 0.121      |
| B*56:01           |                | 0.071            | 0.015      |
| B*56:02           |                | 0.010            | 0.136      |
| B*57:01           | 3DL1           |                  | 0.015      |
