# Supplementary material
Source: PubMed Central journal article supplement (PMC4198482)
Supplement: NIHMS622407-supplement-251_2014_794_MOESM2_ESM.pdf [file NIHMS622407-supplement-251_2014_794_MOESM2_ESM.pdf]

| KIR  | allele | frequency |            |
|------|--------|-----------|------------|
|      |        | Māori     | Polynesian |
| 3DL3 | *00101 | 0.061     | 0.044      |
|      | *00102 | 0.010     |            |
|      | *00202 | 0.082     | 0.059      |
|      | *00206 | 0.010     |            |
|      | *00301 | 0.133     | 0.118      |
|      | *00401 | 0.102     | 0.015      |
|      | *00701 | 0.031     | 0.015      |
|      | *00801 | 0.010     | 0.015      |
|      | *00802 | 0.031     | 0.029      |
|      | *00901 | 0.020     | 0.118      |
|      | *00902 | 0.020     | 0.162      |
|      | *01001 | 0.082     | 0.118      |
|      | *01002 | 0.020     | 0.015      |
|      | *01302 | 0.071     | 0.015      |
|      | *01306 | 0.010     | 0.015      |
|      | *01402 | 0.061     | 0.029      |
|      | *01501 | 0.010     |            |
|      | *01502 | 0.204     | 0.206      |
|      | *017   | 0.010     | 0.015      |
|      | *018   | 0.010     |            |
|      | *023   | 0.010     | 0.015      |

| KIR     | allele    | frequency |            |
|---------|-----------|-----------|------------|
|         |           | Māori     | Polynesian |
| 2DS2    | *001      | 0.286     | 0.176      |
|         | neg       | 0.714     | 0.824      |
| 2DL2/3  | 2*001     | 0.143     | 0.118      |
|         | 2*003     | 0.184     | 0.059      |
|         | 3*00101   | 0.571     | 0.676      |
|         | ‡ 3*00110 | 0.041     | 0.088      |
|         | 3*002     | 0.061     | 0.059      |
| 2DL5B   | B*002     | 0.122     | 0.162      |
|         | neg       | 0.878     | 0.838      |
| 2DS3/5c | 3*001     | 0.122     | 0.103      |
|         | 3*002     |           | 0.059      |
|         | neg       | 0.878     | 0.838      |
| 2DL1    | *001      |           | 0.015      |
|         | *002      | 0.061     | 0.044      |
|         | *00302    | 0.612     | 0.750      |
|         | *00401    | 0.102     | 0.088      |
|         | *010      | 0.031     | 0.015      |
|         | neg       | 0.194     | 0.088      |

| KIR     | allele  | frequency |            |
|---------|---------|-----------|------------|
|         |         | Māori     | Polynesian |
| 2DL4    | *00102  | 0.500     | 0.324      |
|         | *00501  | 0.235     | 0.162      |
|         | *00601  | 0.031     | 0.176      |
|         | *00801  | 0.041     | 0.074      |
|         | *00802  | 0.061     | 0.015      |
|         | *011    | 0.092     | 0.147      |
|         | † *028  | 0.041     | 0.044      |
|         | neg     |           | 0.059      |
| 3DL1/S1 | *001    | 0.041     | 0.074      |
|         | *002    | 0.020     |            |
|         | *00401  | 0.061     | 0.015      |
|         | *005    | 0.092     | 0.147      |
|         | *007    | 0.031     | 0.176      |
|         | *008    |           | 0.015      |
|         | *01502  | 0.184     | 0.147      |
|         | *020    | 0.092     | 0.059      |
|         | *029    | 0.133     | 0.103      |
|         | † *080  | 0.071     |            |
|         | † *086  | 0.041     | 0.044      |
|         | S1*013  | 0.235     | 0.162      |
|         | neg     |           | 0.059      |
| 2DL5A   | A*00101 | 0.163     | 0.118      |
|         | A*005   | 0.071     | 0.059      |
|         | neg     | 0.765     | 0.824      |

| KIR     | allele | frequency |            |       |
|---------|--------|-----------|------------|-------|
|         |        | Māori     | Polynesian |       |
| 2DS3/5t | 3*002  | 0.071     | 0.059      |       |
|         | 5*002  | 0.163     | 0.118      |       |
|         | neg    | 0.765     | 0.824      |       |
| 2DS1    | *002   | 0.232     | 0.191      |       |
|         | neg    | 0.768     | 0.809      |       |
| 2DS4    | *00101 | 0.541     | 0.353      |       |
|         | *003   | 0.041     | 0.103      |       |
|         | *004   | 0.031     | 0.162      |       |
|         | *006   | 0.061     | 0.015      |       |
|         | *010   | 0.092     | 0.147      |       |
|         | neg    | 0.235     | 0.221      |       |
| 3DL2    | *001   | 0.061     | 0.088      |       |
|         | *002   | 0.449     | 0.309      |       |
|         | *003   | 0.041     |            |       |
|         | *005   | 0.010     | 0.015      |       |
|         | *007   | 0.235     | 0.206      |       |
|         | *008   | 0.020     | 0.059      |       |
|         | *009   | 0.092     | 0.074      |       |
|         | *010   | 0.071     | 0.147      |       |
|         | *011   | 0.010     |            |       |
|         |        | *036      | 0.010      | 0.103 |
