# Supplementary material
Source: PubMed Central journal article supplement (PMC4198482)
Supplement: NIHMS622407-supplement-251_2014_794_MOESM3_ESM.pdf [file NIHMS622407-supplement-251_2014_794_MOESM3_ESM.pdf]

a.

|    | Centromeric KIR haplotypes |      |        |       |         |        | Frequency |            |           |          |           |
|----|----------------------------|------|--------|-------|---------|--------|-----------|------------|-----------|----------|-----------|
|    | 3DL3                       | 2DS2 | 2DL2/3 | 2DL5B | 2DS3/5c | 2DL1   | Māori     | Polynesian | Ameridian | European | W-African |
| 1  | *015                       |      | 3*001  |       |         | *003   | 0.214     | 0.200      |           | 0.016    | 0.016     |
| 2  | *010                       |      | 3*001  |       |         | *003   | 0.102     | 0.129      | 0.041     | 0.013    | 0.019     |
| 3  | *002                       |      | 3*001  |       |         | *003   | 0.092     | 0.043      |           | 0.109    | 0.030     |
| 4  | *004                       | *001 | 2*003  |       |         |        | 0.092     | 0.014      | 0.008     |          | 0.011     |
| 5  | *003                       | *001 | 2*001  |       |         | *004   | 0.071     | 0.071      |           | 0.066    |           |
| 6  | *013                       |      | 3*001  |       |         | *003   | 0.071     | 0.029      |           | 0.020    |           |
| 7  | *008                       |      | 3*001  |       |         | *003   | 0.041     | 0.043      |           | 0.017    |           |
| 8  | *001                       |      | 3*002  |       |         | *002   | 0.041     | 0.029      |           | 0.143    |           |
| 9  | *009                       |      | 3*001  |       |         | *003   | 0.041     | 0.271      | 0.041     | 0.097    | 0.104     |
| 10 | *003                       |      | 2*001  |       |         |        | 0.041     |            |           |          |           |
| 11 | *001                       |      | 3*001  |       |         | *003   | 0.031     | 0.029      |           | 0.057    | 0.003     |
| 12 | *014                       | *001 | 2*003  |       |         |        | 0.031     | 0.014      |           | 0.023    | 0.005     |
| 13 | *003                       | *001 | 2*003  |       |         |        | 0.020     | 0.014      | 0.492     | 0.064    | 0.005     |
| 14 | *007                       | *001 | 2*001  |       |         | *004   | 0.020     | 0.014      |           | 0.003    |           |
| 15 | *014                       | *001 | 2*003  |       |         | *010   | 0.020     | 0.014      |           |          |           |
| 16 | *017                       |      | 3*002  |       |         | *002   | 0.010     | 0.014      |           | 0.010    |           |
| 17 | *023                       |      | 3*001  |       |         | *003   | 0.010     | 0.014      |           |          |           |
| 18 | *014                       | *001 | 2*001  |       |         | *004   | 0.010     |            |           | 0.020    | 0.019     |
| 19 | *013                       |      | 3*002  |       |         | *002   | 0.010     |            |           | 0.049    | 0.003     |
| 20 | *007                       | *001 | 2*003  |       |         |        | 0.010     |            |           | 0.032    |           |
| 21 | *018                       |      | 3*001  |       |         | *003   | 0.010     |            |           | 0.002    |           |
| 22 | *004                       | *001 | 2*003  |       |         | *010   | 0.010     |            |           |          |           |
| 23 | *003                       | *001 | 2*001  |       |         | S3*002 |           | 0.029      |           |          |           |
| 24 | *002                       |      | 3*001  |       |         | S3*002 |           | 0.014      |           |          |           |
| 25 | *009                       |      | 3*002  |       |         | *001   |           | 0.014      |           |          |           |
|    |                            |      |        |       |         | Σ      | 1.000     | 1.000      | 0.582     | 0.740    | 0.216     |

b.

|    | Telomeric KIR haplotypes |         |       |          |       |         |      |      |      | Frequency |            |           |          |           |          |
|----|--------------------------|---------|-------|----------|-------|---------|------|------|------|-----------|------------|-----------|----------|-----------|----------|
|    | 2DL4                     | 3DL1/S1 | 2DL4b | 3DL1/S1b | 2DL5A | 2DS3/5t | 2DS1 | 2DS4 | 3DL2 | Māori     | Polynesian | Ameridian | European | W-African | Japanese |
| 1  | *001                     | *015    |       |          |       |         |      | *001 | *002 | 0.194     | 0.132      | 0.213     | 0.060    | 0.041     | 0.385    |
| 2  | *005                     | S1*013  |       |          | A*001 | 5*002   | *002 |      | *007 | 0.163     | 0.118      | 0.516     | 0.128    | 0.011     | 0.056    |
| 3  | *001                     | *029    |       |          |       |         |      | *001 | *002 | 0.133     | 0.103      | 0.221     |          |           |          |
| 4  | *001                     | *020    |       |          |       |         |      | *001 | *009 | 0.092     | 0.059      |           | 0.016    | 0.033     | 0.044    |
| 5  | *011                     | *005    |       |          |       |         |      |      | *010 | 0.071     | 0.147      | 0.049     | 0.022    |           | 0.047    |
| 6  | *005                     | S1*013  |       |          | A*005 | 3*002   | *002 |      | *007 | 0.071     | 0.029      |           |          |           | 0.030    |
| 7  | *001                     | *080    |       |          |       |         |      | *001 | *002 | 0.071     |            |           |          |           |          |
| 8  | *008                     | *001    |       |          |       |         |      |      | *001 | 0.041     | 0.059      |           | 0.141    | 0.117     | 0.017    |
| 9  | *028                     | *086    |       |          |       |         |      | *001 | *002 | 0.041     | 0.044      |           |          |           |          |
| 10 | *008                     |         |       |          |       |         |      |      | *003 | 0.041     |            |           | 0.053    | 0.077     |          |
| 11 | *006                     | *007    |       |          |       |         |      |      | *008 | 0.020     | 0.059      |           | 0.023    | 0.025     | 0.094    |
| 12 | *011                     | *005    |       |          |       |         |      |      | *001 | 0.020     |            |           | 0.114    |           | 0.030    |
| 13 | *001                     | *002    |       |          |       |         |      | *001 | *002 | 0.020     |            |           | 0.098    |           |          |
| 14 | *008                     |         |       |          |       |         |      |      | *005 | 0.010     | 0.015      |           | 0.061    |           |          |
| 15 | *008                     |         |       |          |       |         |      |      | *011 | 0.010     |            |           | 0.007    |           |          |
| 16 | *006                     | *007    |       |          |       |         |      |      | *036 |           | 0.103      |           |          |           |          |
| 17 |                          |         |       |          |       |         | *002 |      | *007 |           | 0.059      |           | 0.013    | 0.014     |          |
| 18 | *001                     | *015    |       |          |       |         |      | *001 | *001 |           | 0.015      |           |          | 0.041     |          |
| 19 | *001                     | *008    |       |          |       |         |      |      | *009 |           | 0.015      |           | 0.055    |           |          |
| 20 | *005                     | S1*013  |       |          | A*005 | 3*002   | *002 |      | *002 |           | 0.015      |           |          |           | 0.009    |
| 21 | *006                     | *007    |       |          |       |         |      |      | *002 |           | 0.015      |           |          |           |          |
| 22 | *008                     | *001    | *005  | S1*013   | A*005 | 3*002   |      |      | *001 |           | 0.015      |           |          |           |          |
|    |                          |         |       |          |       |         |      |      | Σ    | 1.000     | 1.000      | 1.000     | 0.792    | 0.358     | 0.712    |
